# Supplementary material
Source: publisher figshare collection journal article supplement (https://acs.figshare.com/ndownloader/files/4203595)

# Reactivity of Digermynes toward Potassium Graphite: Synthesis and Characterization of Germylidenide Anions

*Siew-Peng Chia,<sup>#</sup> Hui-Xian Yeong,<sup>#</sup> Cheuk-Wai So\**

Division of Chemistry and Biological Chemistry, School of Physical and Mathematical Sciences, Nanyang Technological University, 21 Nanyang Link, 637371 Singapore.

## Supporting Information

1. **Figure S1.** The asymmetric unit of compound **4B** (20% thermal ellipsoids). Hydrogen atoms and disordered Et<sub>2</sub>O molecules at the K(1) and K(3) atoms are omitted for clarity. Ar substituents are also omitted for clarity. The K(2) atom and K(4) atoms coordinate with either a THF or Et<sub>2</sub>O molecule.

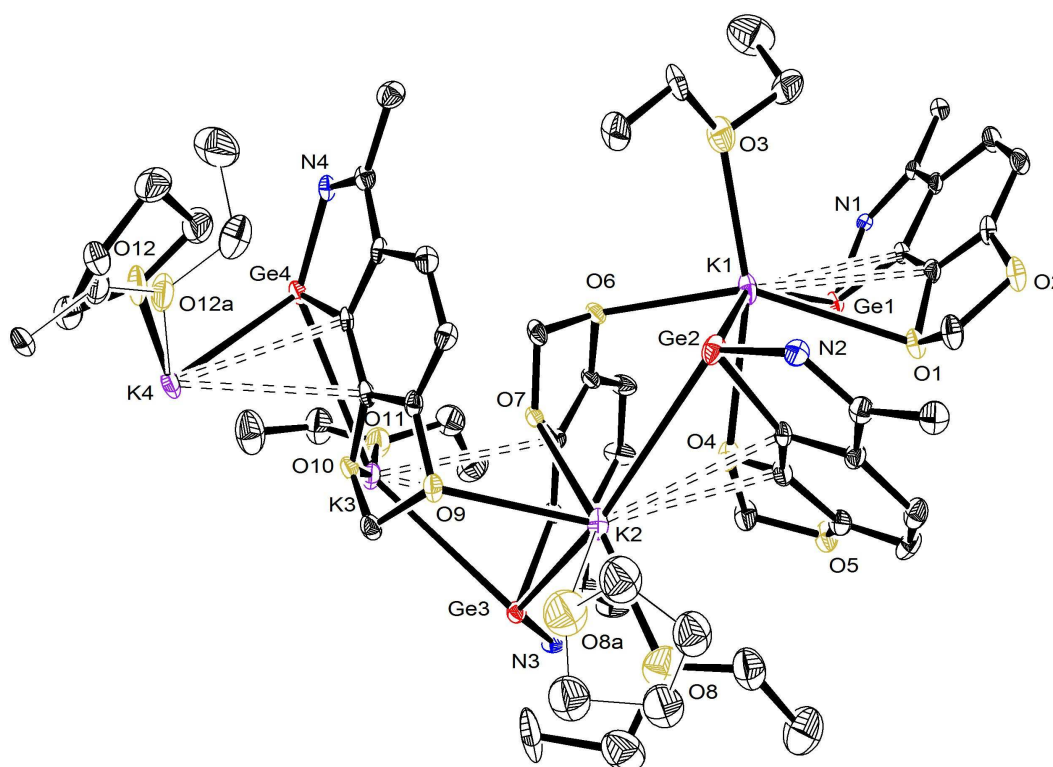

Supplement: Supplementary file 1 [file 4203595]
